# Supplementary material for: Self-assembly and mesophase formation in a non-ionic chromonic liquid crystal: insights from bottom-up and top-down coarse-grained simulation models
Source: Royal Society of Chemistry journal article supplement (doi:10.1039/d0sm01157f), 2020-01-01
Supplement: d0sm01157f1.pdf [file d0sm01157f1.pdf]

# Self-assembly and mesophase formation in a non-ionic chromonic liquid crystal: insights from bottom-up and top-down coarse-grained simulation model

## Electronic supplementary information.

Thomas D. Potter, Martin Walker and Mark R. Wilson

Department of Chemistry, Durham University, Lower Mountjoy, Stockton Road, Durham, DH1 3LE, UK.

### 1 Intramolecular components of the coarse-grained force field

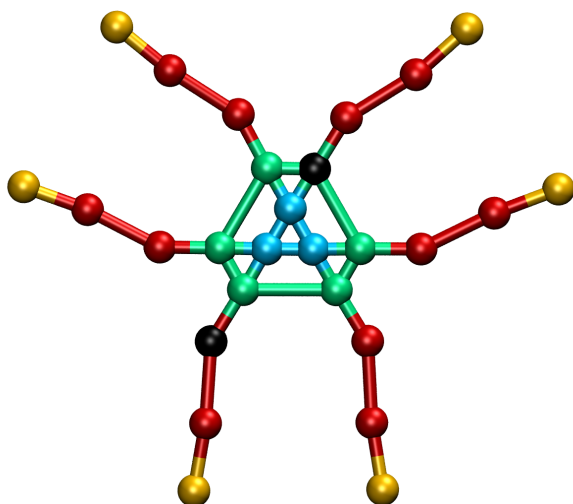

**Fig. 1** Connectivity of the coarse-grained TP6EO2M model. All 1-3 and 1-4 interactions, as well as the 1-5 interactions of the type indicated by the black beads, were excluded from the reference trajectory in the final HFM models developed.

**Table 1** TP6EO2M bond parameters.

| Bond               | $r_0$ / nm | $k_{\text{bond}}$ / $\text{kJ mol}^{-1} \text{nm}^{-2}$ |
|--------------------|------------|---------------------------------------------------------|
| CC-CC              | 0.212      | 15000                                                   |
| CC-CO              | 0.212      | 15000                                                   |
| CO-CO              | 0.212      | 15000                                                   |
| CO-CO <sup>a</sup> | 0.424      | 15000                                                   |
| CO-AI              | 0.276      | 10000                                                   |
| AI-AI              | 0.328      | 10000                                                   |
| AI-AO              | 0.282      | 10000                                                   |

<sup>a</sup>The CO-CO\* bond is along the long edge of the aromatic core.

**Table 2** TP6EO2M angle parameters.

| Angle    | $\theta_0$ / deg | $k_{\text{angle}}$ / $\text{kJ mol}^{-1} \text{deg}^{-2}$ |
|----------|------------------|-----------------------------------------------------------|
| CC-CO-AI | 180              | 85.0                                                      |
| CO-AI-AI | 130              | 85.0                                                      |
| AI-AI-AO | 130              | 85.0                                                      |

**Table 3** TP6EO2M improper dihedral parameters.

| Dihedral    | $\phi_8$ / deg | $k_\phi$ / $\text{kJ mol}^{-1}$ |
|-------------|----------------|---------------------------------|
| CO-CC-CC-CC | 0              | 30.0                            |

### 2 Hybrid force matching intermolecular potentials (C-C interaction)

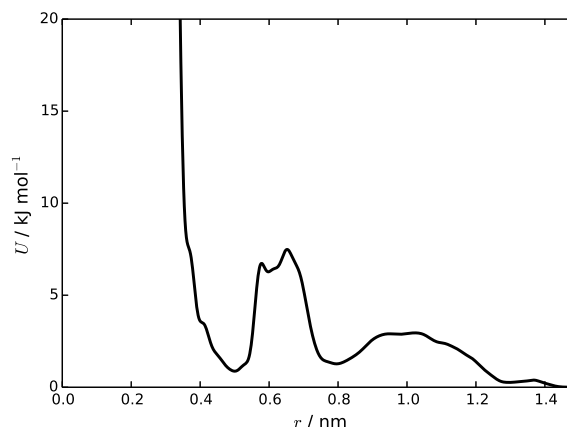

**Fig. 2** C-C interaction potential calculated using HFM, after excluding only coarse-grained bonds and angles from the reference trajectory. The sharp peaks in this are due to 1-4 C-C interactions, and disappear when these pairs are excluded.

<sup>a</sup> Department of Chemistry, Durham University, Lower Mountjoy, Stockton Road, Durham, DH1 3LE, UK; E-mail: mark.wilson@durham.ac.uk

### 3 Snapshot configurations showing self-assembly in solution

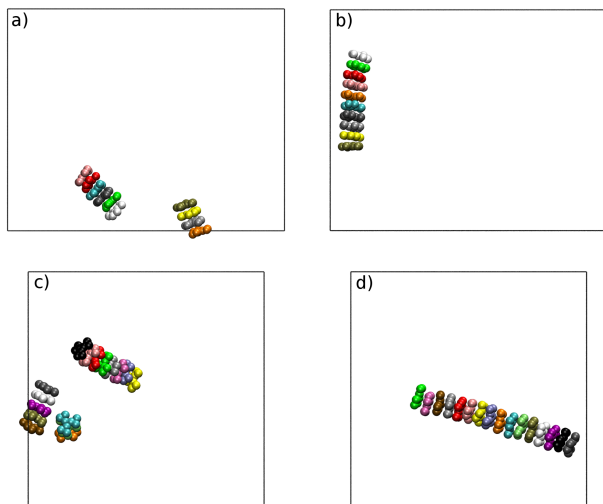

**Fig. 3** Snapshots taken from simulations of 10 (a and b) and 16 (c and d) TP6EO2M molecules, from dispersed starting configurations, using the FM-N (a and c) and FM-Q (b and d) models. (For clarity central cores are shown, water and EO arms are hidden.)

### 4 Structural data for chromonic stacks

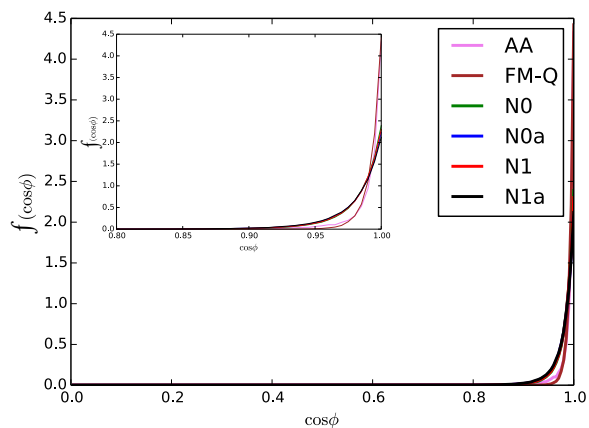

**Fig. 4** Distribution function,  $f(\cos(\phi_{ij}))$ , for angles  $\phi_{ij}$  measured between the short axes of neighbouring molecules  $i$  and  $j$  within TP6EO2M stacks in the isotropic phase.  $f(\cos(\phi_{ij}))$  indicates that tilt angles are strongly peaked around zero for each model. The HFM model almost exactly follows the atomistic distribution function. MARTINI 3 models show a small degree of additional orientational disorder.

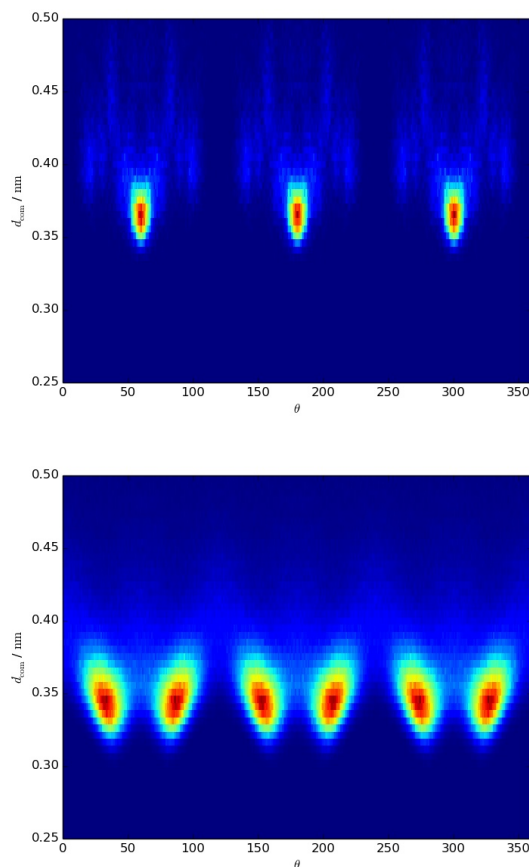

**Fig. 5** 2d distribution function,  $f(d_{com}, \theta_{ij})$ , for azimuthal angles  $\theta_{ij}$  measured between a reference vector in the plane of the aromatic rings for pairs of adjacent molecules  $i$  and  $j$  for TP6EO2M stacks. Top: atomistic model. Bottom: MARTINI N1a model. The atomistic model shows three peaks at 60, 180 and 300 degrees corresponding to staggered conformations of adjacent molecular cores. These peaks are split into two in the coarse-grained MARTINI model due to the presence of the CO beads.

## 5 PMFs for TP6EO2M dimers

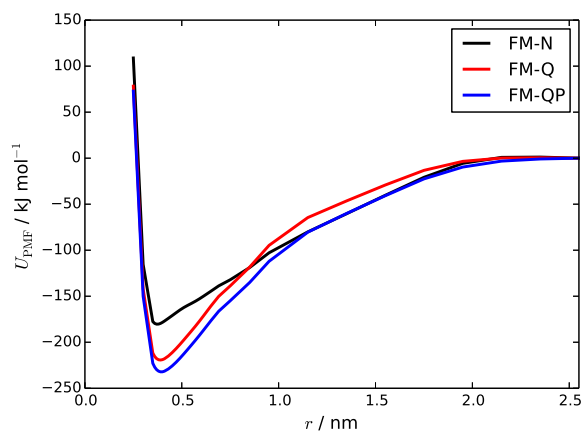

**Fig. 6** PMFs for the formation of a TP6EO2M dimer, calculated using the FM-N and FM-Q models. Also shown are PMF results from a variant of the FM-Q model, FM-QP, where pressure corrections have been applied in fitting the atomistic configurations.

## 6 Snapshots from liquid crystal phases

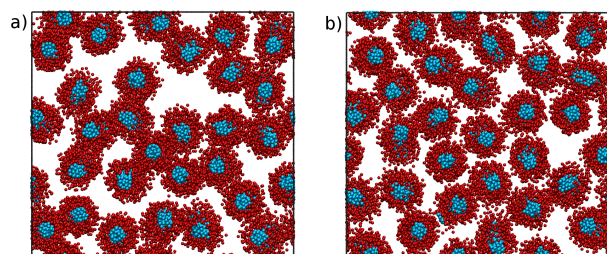

**Fig. 7** Configurations taken after 200 ns of simulations of the 55.8 wt% TP6EO2M/water system. a) The N1 model results in clustering of the columns, while b) the N1a shows the  $C_H$  phase. simulations show only cores (cyan) and arms (red).
